# Supplementary material for: Highly efficient upconversion emission of Er3+ in δ-Sc4Zr3O12 and broad-range temperature sensing
Source: Royal Society of Chemistry journal article supplement (doi:10.1039/c8cp02217h), 2018-01-01
Supplement: c8cp02217h6.pdf [file c8cp02217h6.pdf]

## Highly efficient upconversion emission of Er<sup>3+</sup> in $\delta$ -Sc<sub>4</sub>Zr<sub>3</sub>O<sub>12</sub> and broad-range temperature sensing

Wen Liu<sup>a,b</sup>, Guohui Pan<sup>a,\*</sup>, Zhendong Hao<sup>a</sup>, Liangliang Zhang<sup>a</sup>, Xia Zhang<sup>a</sup>, Yongshi Luo<sup>a</sup>, ,  
Haifeng Zhao<sup>a</sup>, Huajun Wu<sup>a</sup>, Jiahua Zhang<sup>a,\*</sup>

<sup>a</sup> State Key Laboratory of Luminescence and Applications, Changchun Institute of Optics, Fine  
Mechanics and Physics, Chinese Academy of Sciences, 3888 Eastern South Lake Road,  
Changchun 130033, China

<sup>b</sup> University of Chinese Academy of Sciences, Beijing, 100049, China

### Figure S1-S

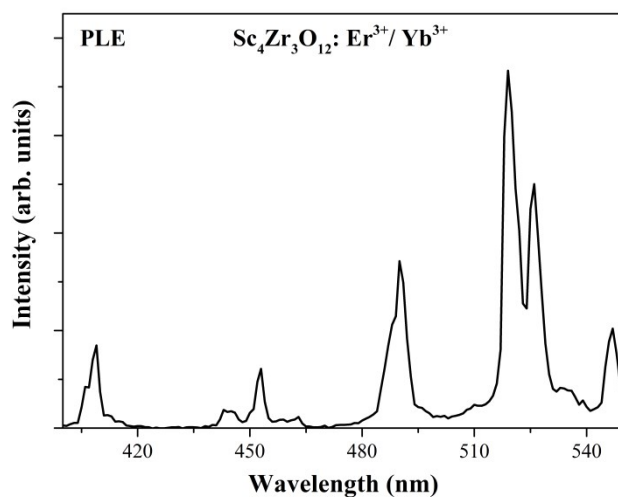

Figure S1. The excitation spectrum of Sc<sub>4</sub>Zr<sub>3</sub>O<sub>12</sub>:1%Er<sup>3+</sup>/2%Yb<sup>3+</sup> sample monitored at 563 nm.

---

\* Corresponding author. Tel./Fax: +86-431-8617-6317;

Email address: [pangh@ciomp.ac.cn](mailto:pangh@ciomp.ac.cn); [zhangjh@ciomp.ac.cn](mailto:zhangjh@ciomp.ac.cn)

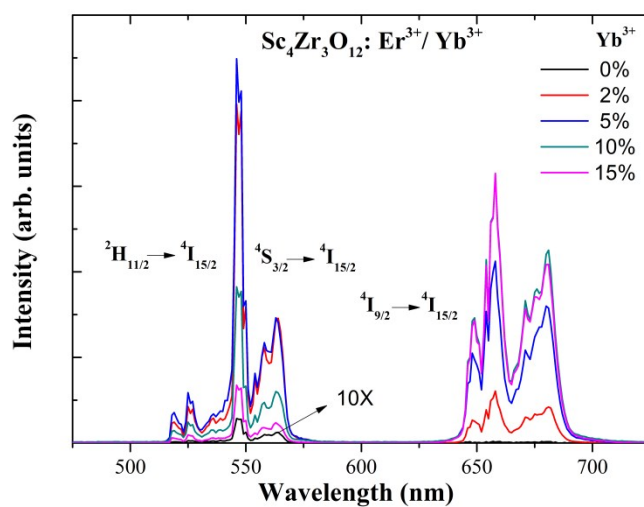

Figure S2. UC luminescence spectra of  $\text{Sc}_4\text{Zr}_3\text{O}_{12}:\text{Er}^{3+}/\text{Yb}^{3+}$  series samples with different  $\text{Yb}^{3+}$  doping concentrations by 972 nm excitation.

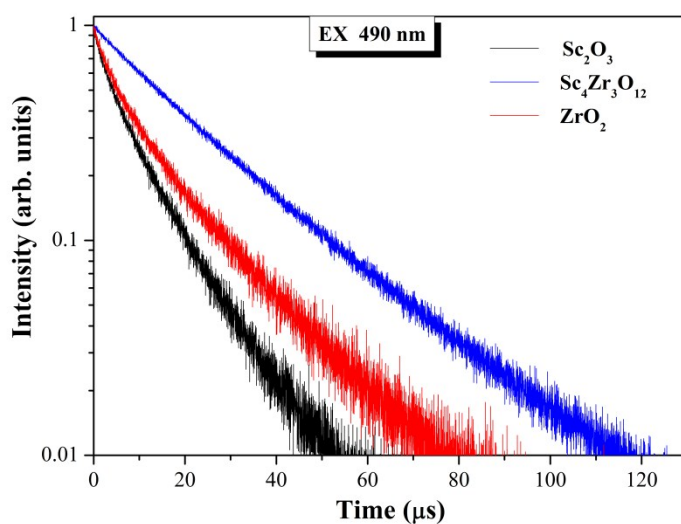

Figure S3. Decay curves of  $\text{Er}^{3+}/\text{Yb}^{3+}$  codoped  $\text{Sc}_2\text{O}_3$ ,  $\text{Sc}_4\text{Zr}_3\text{O}_{12}$  and  $\text{ZrO}_2$  samples monitored at 546 nm under 490 nm excitation.

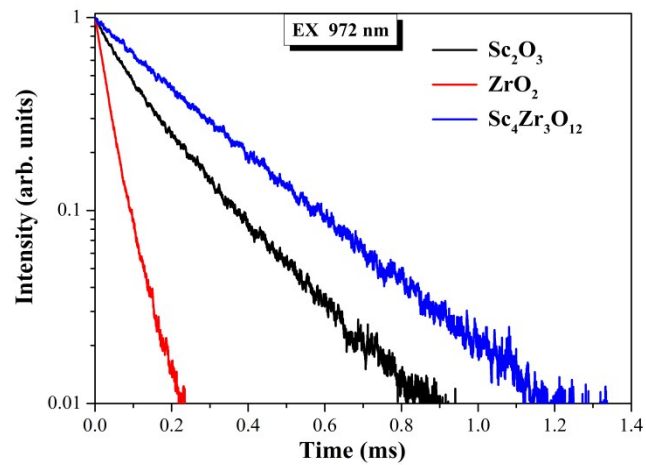

Figure S4. Under 972 nm excitation, the decay curves of Er<sup>3+</sup>/Yb<sup>3+</sup> codoped Sc<sub>2</sub>O<sub>3</sub>, Sc<sub>4</sub>Zr<sub>3</sub>O<sub>12</sub> and ZrO<sub>2</sub> samples when monitoring at 546 nm.
