# Supplementary figures and images for: Highly efficient upconversion emission of Er3+ in δ-Sc4Zr3O12 and broad-range temperature sensing
Source: Royal Society of Chemistry journal article supplement (doi:10.1039/c8cp02217h), 2018-01-01

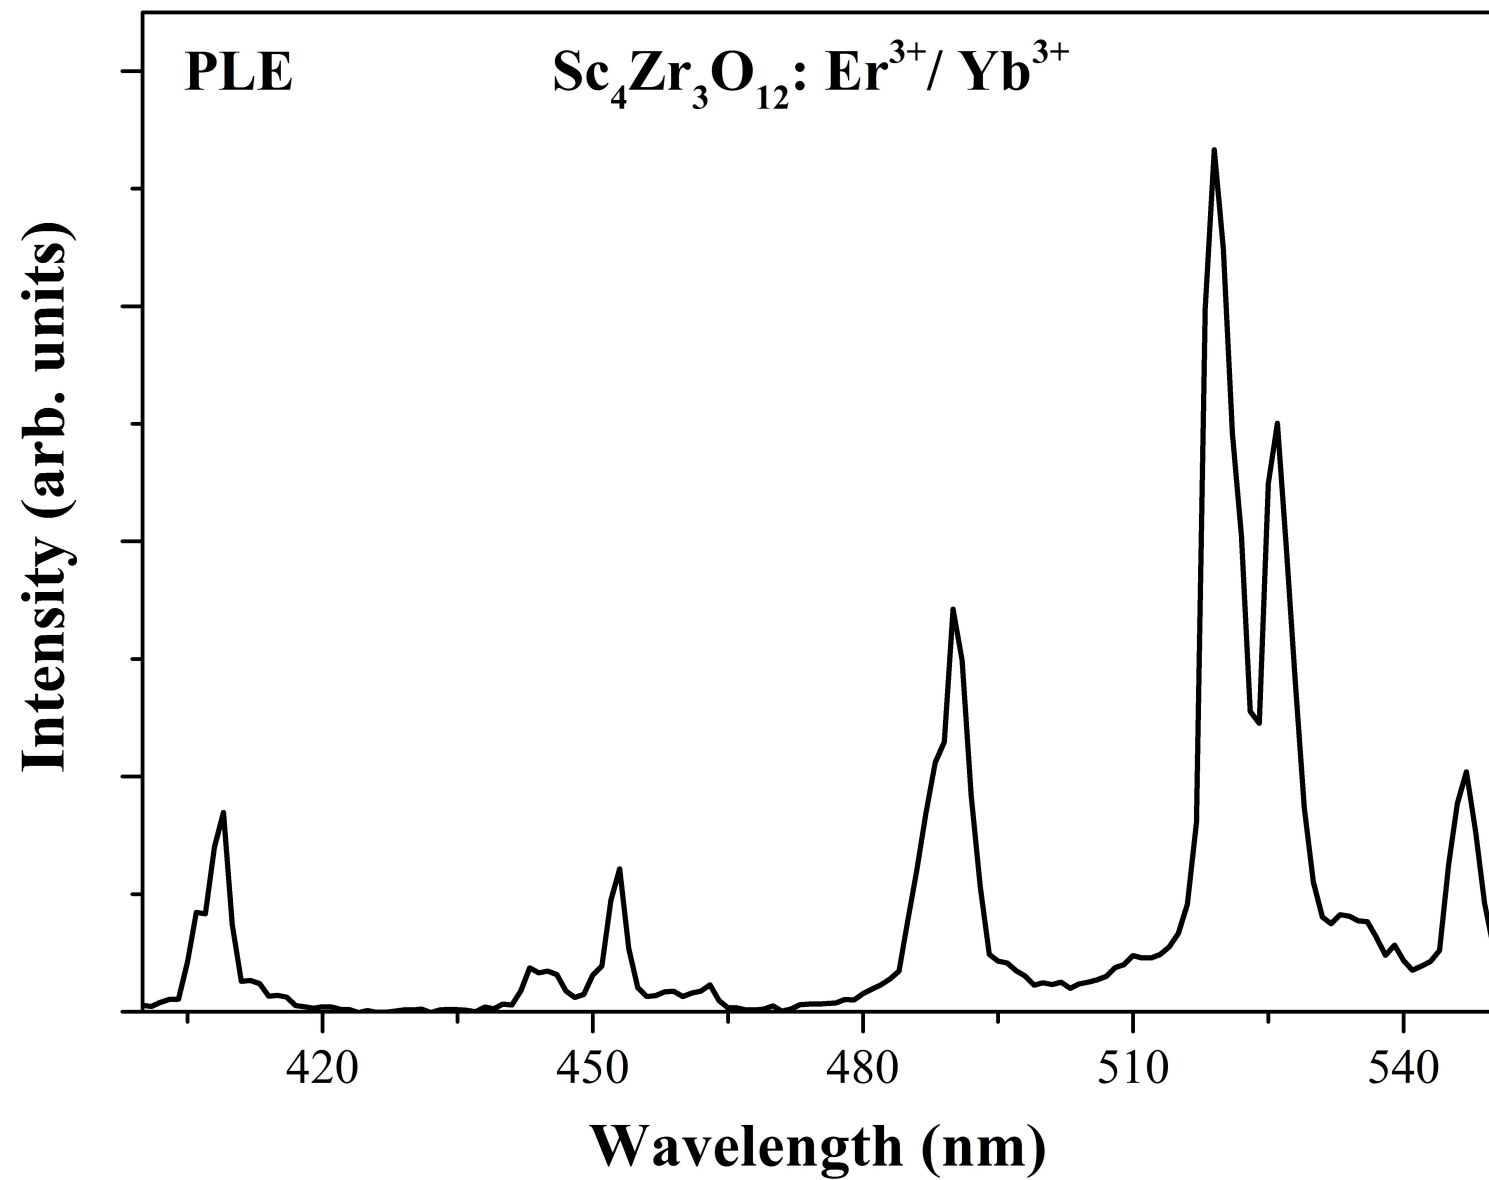

Supplement: c8cp02217h3.pdf [file c8cp02217h3.pdf]

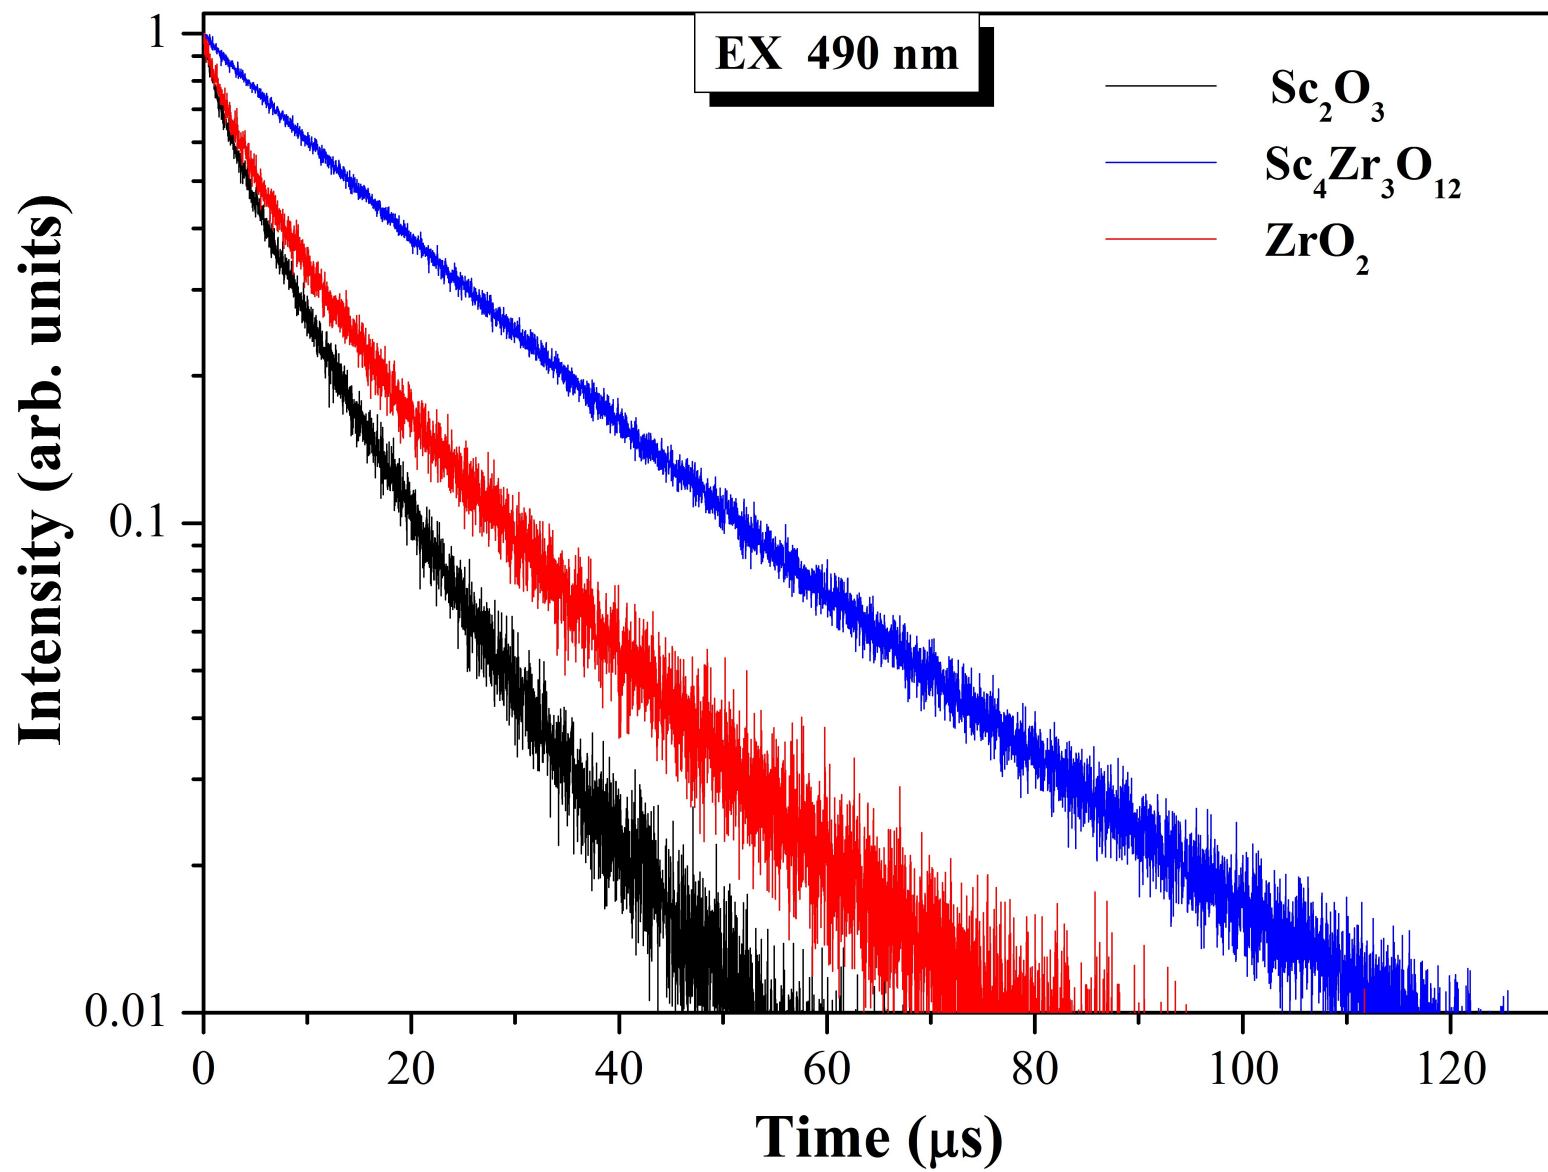

Supplement: c8cp02217h4.pdf [file c8cp02217h4.pdf]
